# Supplementary material for: The role of ambient temperature and body mass on body temperature, standard metabolic rate and evaporative water loss in southern African anurans of different habitat specialisation
Source: PeerJ. 2019 Oct 22;7:e7885. doi: 10.7717/peerj.7885 (PMC6814148; doi:10.7717/peerj.7885)
Supplement: Supplemental Information 2 [file peerj-07-7885-s002.xlsx]

## Sheet: Data
Species	ID	Sex	Mass_F	Mass_Log	Tb_I	Tb_F	Tcham	Test temp	Fri	VO2	MVO2	VCO2	VH2O	MVH2O	VPD	VPD_C
Amietia	RF13	Female	39.885	1.60081	20.2	20.1	20.5	20	0.4428	6.78706	0.170166	1.92981	0.236257	0.00592345	22.8908	High
Amietia	RF10	Male	8.44	0.926342	20.1	18.4	20.2	20	0.4428	6.59657	0.781584	1.4707	0.224133	0.0265561	22.5205	Low
Amietia	RF12	Female	23.475	1.37061	20.1	18.5	20.3	20	0.4428	6.23976	0.265804	0.835718	0.222389	0.00947342	22.6667	High
Amietia	RF02	Female	9.46	0.975891	20.3	18.9	20.4	20	0.4428	6.06946	0.641592	1.18722	0.219184	0.0231696	22.8468	High
Amietia	RF07	Female	20.04	1.3019	23.5	19.3	20.4	20	0.4428	6.87394	0.343011	1.23135	0.230448	0.0114994	22.6619	Low
Amietia	RF11	Male	6.555	0.816573	24	18.7	20.7	20	0.4428	6.83223	1.04229	0.54038	0.243719	0.0371806	23.1411	High
Amietia	RF22	Male	9.085	0.958325	23.3	17.4	20.7	20	0.4428	6.97304	0.767533	0.731646	0.249101	0.0274189	23.1239	High
Amietia	RF25	Male	8.28	0.91803	22.5	18.3	20.4	20	0.4428	8.33438	1.00657	1.1626	0.281123	0.033952	22.5129	Low
Amietia	RF26	Female	30.525	1.48466	19.9	28.4	30.8	30	0.4428	11.7949	0.3864	3.60291	0.389275	0.0127526	42.4111	High
Amietia	RF18	Male	7.43	0.870989	21.1	26.6	31	30	0.4428	7.85802	1.05761	0.646107	0.268069	0.0360793	43.5321	High
Amietia	RF19	Female	15.025	1.17681	21.4	26	30.8	30	0.4428	7.50732	0.499655	0.758107	0.281725	0.0187504	42.9633	High
Amietia	RF04	Male	6.915	0.839792	22	25.8	30.8	30	0.4428	8.60511	1.24441	0.385241	0.303537	0.0438954	42.8546	High
Amietia	RF05	Male	4.6	0.662758	22.1	28	30.7	30	0.4428	7.99484	1.73801	0.898275	0.290466	0.0631447	42.6682	High
Amietia	RF15	Female	8.885	0.948657	23.1	26	30.7	30	0.4428	10.505	1.18233	0.788113	0.368154	0.0414354	42.2704	High
Amietia	RF16	Female	9.64	0.984077	22.7	26	30.5	30	0.4428	8.50521	0.882284	0.528028	0.307323	0.0318799	42.0802	High
Amietia	RF03	Male	7.49	0.874482	21.3	5.7	6.3	5	0.4428	4.74079	0.63295	0.586231	0.168142	0.0224489	8.68467	Low
Amietia	RF21	Male	6.425	0.807873	22.7	5.4	6.3	5	0.4428	5.43289	0.845586	0.392335	0.183036	0.028488	8.60928	Low
Amietia	RF01	Male	8.94	0.951338	20.8	5.7	6.3	5	0.55132	2.55801	0.286131	0.23821	0.0969259	0.0108418	9.14907	Low
Amietia	RF17	Male	9.135	0.960709	21.4	5.7	6.3	5	0.55132	6.45276	0.706378	0.406739	0.220272	0.024113	8.64314	Low
Amietia	RF13	Female	35.37	1.54864	20.8	7.3	6.5	5	0.55132	7.99491	0.226037	1.88282	0.26688	0.00754538	8.58463	Low
Amietia	RF07	Female	20.33	1.30814	21.7	6.2	6.3	5	0.55132	7.51162	0.369485	0.670214	0.244768	0.0120397	8.54267	Low
Amietia	RF15	Female	9.305	0.968716	22.3	6	6.3	5	0.65984	10.0686	1.08207	1.71303	0.368333	0.0395844	8.28432	Low
Amietia	RF12	Female	25.59	1.40807	21.5	5.4	6.1	5	0.65984	11.7069	0.457479	1.15089	0.396775	0.0155051	8.05578	Low
Amietia	RF26	Female	30.51	1.48444	20.3	22.1	25.6	25	0.4428	9.31687	0.305371	0.960582	0.313284	0.0102682	31.2092	High
Amietia	RF02	Female	9.435	0.974742	22.6	22.6	25.8	25	0.4428	8.07827	0.856202	1.02501	0.281616	0.029848	31.7689	High
Amietia	RF14	Female	7.2	0.857332	22.7	21.7	25.8	25	0.4428	8.15266	1.13231	0.909826	0.29468	0.0409277	31.7061	High
Amietia	RF25	Male	8.25	0.916454	21.9	22.4	25.8	25	0.4428	8.13751	0.986365	0.683653	0.297677	0.036082	31.6921	High
Amietia	RF19	Female	15.525	1.19103	20.7	21.9	25.7	25	0.4428	8.45287	0.544469	0.91239	0.296466	0.019096	31.5032	High
Amietia	RF01	Male	9.14	0.960946	23.4	23.4	25.8	25	0.4428	7.76636	0.849711	1.02556	0.258468	0.0282787	31.8831	High
Amietia	RF03	Male	7.51	0.87564	24.2	22.8	25.9	25	0.4428	6.6149	0.880812	0.287232	0.232962	0.0310202	32.22	High
Amietia	RF20	Male	9.865	0.994097	20.1	20.5	25.8	25	0.4428	7.5384	0.764157	0.772159	0.264143	0.0267758	31.8668	High
Amietia	RF07	Female	19.52	1.29048	21	14.3	15.2	15	0.4428	8.46828	0.433826	1.03501	0.273256	0.0139988	15.8776	Low
Amietia	RF22	Male	9.42	0.974051	21.2	12.6	14.9	15	0.65984	10.4566	1.11004	1.11454	0.354098	0.0375901	15.7293	Low
Amietia	RF15	Female	8.565	0.932727	22.1	13.3	15	15	0.55132	8.75209	1.02184	0.549211	0.305691	0.0356908	15.7984	Low
Amietia	RF16	Female	9.61	0.982723	21.8	13.9	15.2	15	0.55132	4.76771	0.496119	0.520217	0.18617	0.0193725	16.5095	Low
Amietia	RF18	Female	7.475	0.873611	21.4	14.5	14.9	15	0.55132	9.0809	1.21484	0.808204	0.31498	0.0421378	15.6509	Low
Amietia	RF10	Male	8.045	0.905526	22	14.6	15.1	15	0.55132	6.19838	0.770464	0.542572	0.217291	0.0270095	16.2711	Low
Amietia	RV02	Male	7.45	0.872156	21.6	14.5	14.9	15	0.55132	7.21689	0.96871	0.836851	0.263397	0.0353552	15.8624	Low
Amietia	RF04	Male	7.17	0.855519	21.9	14.8	15.1	15	0.55132	6.42431	0.895999	0.754804	0.217873	0.0303868	16.2687	Low
Amietia	RV17	Male	9.04	0.956168	22.3	29.4	35.7	35	0.4428	12.4761	1.3801	1.33859	0.438654	0.0485237	56.1923	High
Amietia	RV13	Female	34.72	1.54058	21.3	29.5	35.6	35	0.4428	11.0151	0.317255	4.38434	0.376351	0.0108396	56.1899	High
Amietia	RF07	Female	20.655	1.31503	20.2	30	35.8	35	0.4428	11.538	0.558603	1.9701	0.408357	0.0197704	56.6691	High
Amietia	RF19	Female	15.925	1.20208	19	28.5	36	35	0.4428	9.10326	0.571633	1.07277	0.332021	0.0208491	57.7076	High
Amietia	RF22	Male	10.025	1.00108	22.1	29.4	35.6	35	0.4428	10.4317	1.04056	1.54284	0.35922	0.0358325	56.2774	High
Amietia	RF14	Female	7.555	0.878234	22.2	27.8	36	35	0.4428	7.65716	1.01352	1.08984	0.261475	0.0346095	58.0679	High
Amietia	RF02	Male	7.15	0.854306	21.1	29.9	35.6	35	0.4428	13.4586	1.88231	1.35845	0.489071	0.0684015	55.6143	High
Amietia	RF21	Male	6.095	0.784974	23.5	28.9	36	35	0.4428	8.95368	1.46902	0.968316	0.323732	0.0531144	57.75	High
Amietia	RF26	Female	30.64	1.48629	19.5	10.8	10.3	10	0.65984	7.95767	0.259715	0.590776	0.276796	0.00903381	11.5793	Low
Amietia	RF25	Male	8.63	0.936011	21.3	10.01	10.3	10	0.65984	9.44389	1.09431	2.20603	0.342831	0.0397254	11.353	Low
Amietia	RF07	Male	9.145	0.961184	22.1	9.2	10.3	10	0.65984	9.60186	1.04996	1.21392	0.328117	0.0358794	11.4035	Low
Amietia	RF15	Female	8.78	0.943495	22.2	9.3	10.4	10	0.65984	7.64807	0.871079	1.23436	0.274251	0.0312359	11.672	Low
Amietia	RF04	Male	7.46	0.872739	21.6	10	10.7	10	0.65984	7.58552	1.01683	1.27211	0.27383	0.0367064	11.9284	Low
Amietia	RF16	Female	10.19	1.00817	24.4	9.9	10.5	10	0.55132	6.85798	0.673011		0.228286	0.0224029	11.7601	Low
Amietia	RF10	Male	8.275	0.917768	21.9	9.6	10.5	10	0.4428	4.00513	0.484003	0.148451	0.198765	0.02402	11.6813	Low
Amietia	RF19	Female	16.665	1.22181	18.9	10	10.5	10	0.4428	5.10318	0.306222	0.518761	0.161938	0.00971725	11.8694	Low
Amietia	RF16	Female	10.19	1.00817	24.4	9.9	10.5	10	0.55132	6.18184	0.606658	0.954461	0.228286	0.0224029	11.7601	Low
Sclerophrys	RT17	Female	112.99	2.05304	21.3	25.7	25.6	25	0.28002	4.8915	0.0432915	0.933144	0.184147	0.00162976	31.3067	HIGH
Sclerophrys	RT07	Male	61.555	1.78926	21.2	24.9	24.6	25	0.28002	6.02306	0.0978485	2.07872	0.196505	0.00319235	29.3199	HIGH
Sclerophrys	RT06	Female	66.985	1.82598	20.8	23.5	25.2	25	0.28002	4.78313	0.071406	1.01198	0.162964	0.00243285	30.7214	HIGH
Sclerophrys	RT01	Male	47.1	1.67302	20.3	24	25.8	25	0.28002	4.94039	0.104892	1.14274	0.163867	0.00347913	31.8801	HIGH
Sclerophrys	RT03	Male	52.06	1.7165	21.3	24.2	25.8	25	0.28002	8.23292	0.158143	3.48522	0.268137	0.00515053	31.029	HIGH
Sclerophrys	RT02	Female	52.43	1.71958	21.7	24.9	26.3	25	0.28002	6.0444	0.115285	2.00409	0.217546	0.00414927	32.4369	HIGH
Sclerophrys	RT05	Female	33.92	1.53046	21.7	23.6	25.5	25	0.28002	5.2119	0.153653	0.676962	0.175482	0.00517341	31.122	HIGH
Sclerophrys	RT04	Male	33.815	1.52911	21.6	24.2	25.5	25	0.28002	6.9814	0.206459	1.05876	0.236979	0.00700811	30.649	HIGH
Sclerophrys	RT12	Female	48.63	1.6869	21.4	14.7	15.1	15	0.28002	3.3016	0.0678923	2.55079	0.0916508	0.00188466	15.6669	LOW
Sclerophrys	RT13	Male	36.44	1.56158	21.2	14.2	15	15	0.28002	3.23171	0.0886858	3.37097	0.0943146	0.00258822	15.4657	LOW
Sclerophrys	RT15	Female	68.505	1.83572	21.5	16.2	15.6	15	0.28002	2.61813	0.0382181	1.63802	0.0827045	0.00120728	16.1935	LOW
Sclerophrys	RT09	Male	44.975	1.65297	21.9	16.1	15.3	15	0.28002	2.77825	0.0617731	1.26723	0.0774436	0.00172193	15.9696	LOW
Sclerophrys	RT14	Female	59.195	1.77229	22.4	15.5	15.3	15	0.28002	4.6588	0.0787027	1.03983	0.153182	0.00258775	15.9414	LOW
Sclerophrys	RT16	Female	63.745	1.80445	20.6	14.6	15	15	0.28002	4.01364	0.062964	0.759038	0.137432	0.00215596	15.9392	LOW
Sclerophrys	RTNG	Male	32.76	1.51534	20.6	14.8	15.2	15	0.366836	7.40136	0.225927	0.634562	0.233347	0.00712293	15.811	LOW
Sclerophrys	RT01	Male	46.69	1.66922	21	14.6	14.8	15	0.366836	3.89646	0.0834538	1.45346	0.134574	0.00288228	16.0044	LOW
Sclerophrys	RT10	Female	94.97	1.97759	20.3	7.7	6.8	5	0.4428	7.39069	0.0778213	20.9009	0.175282	0.00184566	8.98333	LOW
Sclerophrys	RT11	Female	56.43	1.75151	20.3	6.3	6.1	5	0.4428	5.55723	0.09848	3.50722	0.176842	0.00313383	8.51246	LOW
Sclerophrys	RT19	Female	107.61	2.03185	20.8	6.8	6.2	5	0.7141	12.7218	0.118222	3.3207	0.344361	0.00320008	8.39042	LOW
Sclerophrys	RT07	Male	59.06	1.77129	21.2	6.8	6.1	5	0.7141	10.2818	0.17409	2.51412	0.352314	0.00596536	8.2999	LOW
Sclerophrys	RT04	Male	31.535	1.49879	20.8	5.8	6.1	5	0.7141	6.55415	0.207837	3.73126	0.217846	0.00690808	8.72572	LOW
Sclerophrys	RT03	Male	60.045	1.77848	21	7.1	6.8	5	0.7141	5.43073	0.0904443	3.42545	0.180328	0.00300322	9.31029	LOW
Sclerophrys	RTNG	Male	36.49	1.56217	21.3	6.6	5.7	5	0.7141	6.15311	0.168625	2.41603	0.19558	0.00535983	8.53887	LOW
Sclerophrys	RT08	Female	103.88	2.01653	20.2	8	7.2	5	0.4428	6.66246	0.0641361	17.536	0.17659	0.00169994	9.25466	LOW
Sclerophrys	RT01	Male	50.64	1.70449	20.7	28.33	31	30	0.4428	16.271	0.321308	16.3677	0.509033	0.010052	42.3217	HIGH
Sclerophrys	RT07	Male	66.025	1.81971	20.5	27	31.2	30	0.4428	13.2208	0.200239	2.62739	0.489008	0.00740641	42.9379	HIGH
Sclerophrys	RT11	Female	49.46	1.69425	20.4	27.8	30.9	30	0.4428	8.69969	0.175893	2.45419	0.295425	0.00597302	43.1575	HIGH
Sclerophrys	RT15	Female	80.825	1.90755	20.4	27	31.2	30	0.4428	14.7463	0.182447	4.07914	0.507862	0.00628348	42.8333	HIGH
Sclerophrys	RT08	Female	108.64	2.03599	19.9	28.3	30.3	30	0.4428	10.9213	0.100528	9.54638	0.382789	0.00352346	41.207	HIGH
Sclerophrys	RT13	Male	46.135	1.66403	19.9	26.8	30	30	0.4428	13.5244	0.293149	3.7401	0.48717	0.0105597	39.936	HIGH
Sclerophrys	RTNG	Male	37.495	1.57397	19.5	26.7	30.8	30	0.4428	6.9106	0.184307	1.24875	0.263041	0.00701536	43.069	HIGH
Sclerophrys	RTAF	Female	135.15	2.13082	20.4	27.1	30.2	30	0.4428	12.2008	0.0902762	4.17453	0.401094	0.00296777	40.8671	HIGH
Sclerophrys	RT16	Female	72.295	1.85911	19.9	26	34.7	35	0.4428	13.0446	0.180436	5.83624	0.428811	0.00593141	53.1051	HIGH
Sclerophrys	RT03	Male	70.93	1.85083	18.6	29.2	36.3	35	0.4428	11.9787	0.168881	2.46666	0.417855	0.00589109	58.254	HIGH
Sclerophrys	RT05	Female	38.905	1.59001	19.8	27.3	36.3	35	0.4428	5.73683	0.147457	1.37521	0.201425	0.00517734	59.3593	HIGH
Sclerophrys	RT14	Female	66.22	1.82099	19.6	27.3	36	35	0.4428	11.483	0.173406	9.33053	0.372178	0.00562032	57.5026	HIGH
Sclerophrys	RT04	Male	35.34	1.54827	19.8	28.7	36.2	35	0.4428	13.9373	0.394378	5.07299	0.487286	0.0137885	57.5696	HIGH
Sclerophrys	RT12	Female	55.795	1.7466	19.6	28.7	36.2	35	0.4428	10.9662	0.196545	6.87643	0.363588	0.0065165	58.2014	HIGH
Sclerophrys	RT01	Male	53.2	1.72591	18.6	28.2	36.1	35	0.4428	7.00598	0.131691	2.92254	0.241157	0.00453303	58.4984	HIGH
Sclerophrys	RT13	Male	41.74	1.62055	19	27.2	35.4	35	0.4428	10.7842	0.258366	7.20468	0.349856	0.00838179	55.6887	HIGH
Sclerophrys	RTLJ	Female	16.04	1.2052	20.1	28.8	36.8	35	0.4428	5.13745	0.32029	1.12277	0.180417	0.0112479	61.1393	HIGH
Sclerophrys	RTNG	Male	42.095	1.62423	18.8	18.4	20.5	20	0.4428	9.32218	0.221456	1.33899	0.338992	0.00805303	22.3832	HIGH
Sclerophrys	RT15	Female	90.325	1.95581	18.7	20	21.6	20	0.4428	12.2178	0.135265	2.81802	0.438095	0.00485021	23.562	HIGH
Sclerophrys	RT04	Male	33.16	1.52061	18.5	18.5	20.1	20	0.4428	7.26927	0.219218	1.03576	0.256518	0.00773577	22.216	HIGH
Sclerophrys	RT06	Female	61.25	1.78711	19	19.3	19.3	20	0.4428	8.15159	0.133087	1.96798	0.323321	0.00527872	20.7356	LOW
Sclerophrys	RT07	Male	71.615	1.855	19.2	19.3	19.3	20	0.4428	8.34793	0.116567	1.59798	0.278171	0.00388425	20.9662	LOW
Sclerophrys	RT14	Female	72.25	1.85884	18.6	19	20.1	20	0.4428	7.80807	0.10807	2.33315	0.273332	0.00378315	22.1302	LOW
Sclerophrys	RT19	Female	113	2.05308	19.6	20.1	20.2	20	0.4428	9.59291	0.084893	2.96427	0.32315	0.00285973	22.0217	LOW
Sclerophrys	RT19	Female	96.27	1.98349	17.3	11.4	10.5	10	0.4428	6.00118	0.062337	3.97097	0.192642	0.00200106	11.7126	LOW
Sclerophrys	RT04	Male	41.495	1.618	18.7	10.7	10.4	10	0.55132	5.8967	0.142106	0.973253	0.219646	0.00529332	11.711	LOW
Sclerophrys	RT13	Male	47.3	1.67486	21.5	10.7	10.3	10	0.55132	7.89137	0.166837	1.74694	0.261195	0.00552208	11.4566	LOW
Sclerophrys	RT01	Male	48.87	1.68904	20.4	10.4	10.1	10	0.55132	9.32271	0.190766	9.07392	0.286003	0.00585233	11.1883	LOW
Sclerophrys	RT07	Male	57.64	1.76072	17.3	17.3	10.6	10	0.55132	4.94964	0.0858716	1.20073	0.291521	0.00505761	11.5857	LOW
Sclerophrys	RT14	Female	79.925	1.90268	19.3	10.9	10.3	10	0.55132	8.84935	0.110721	10.7999	0.282859	0.00353906	11.3677	LOW
Sclerophrys	RT15	Female	85.63	1.93263	17.2	11.2	10.5	10	0.55132	8.4428	0.0985963	2.21347	0.28876	0.00337218	11.512	LOW
Sclerophrys	RTLJ	Female	23.105	1.36371	19.1	9	9.9	10	0.55132	7.74153	0.335058	0.334854	0.27495	0.0119	11.0646	LOW
Xenopus	XL032	Female	123.315	2.09102	20.3	27.9	30.7	30	0.4428	11.92	0.096663	6.9087	0.388116	0.00314735	42.1777	High
Xenopus	XL052	Male	34.84	1.54208	19.8	26	30.3	30	0.4428	12.7343	0.365508	3.04942	0.443943	0.0127423	40.8947	High
Xenopus	XL036	Female	119.465	2.07724	19.8	25.8	31.2	30	0.4428	12.2226	0.102311	9.17846	0.448557	0.00375472	43.1445	High
Xenopus	XL050	Female	42.09	1.62418	20.4	27.2	30.2	30	0.4428	9.78739	0.232535	3.71696	0.340314	0.00808539	41.1775	High
Xenopus	XL061	Male	20.87	1.31952	19.6	27.6	30.1	30	0.4428	7.30195	0.349878	1.66865	0.243681	0.0116762	41.4258	High
Xenopus	XL057	Male	33.54	1.52556	18.3	25.5	30.5	30	0.4428	8.36254	0.24933	2.26876	0.295826	0.00882011	42.1476	High
Xenopus	XL042	Female	92	1.96379	18.3	27.2	30.6	30	0.4428	12.0682	0.131177	6.74611	0.433712	0.00471426	41.6935	High
Xenopus	XL053	Male	39.045	1.59157	19	26.7	30.6	30	0.4428	10.0507	0.257413	1.60993	0.361453	0.00925734	42.0625	High
Xenopus	XL056	Male	23.91	1.37858	19	19.6	20	20	0.4428	4.95334	0.207166	0.733609	0.181543	0.00759276	22.4538	High
Xenopus	XL038	Female	89.76	1.95308	18.7	19.2	20.6	20	0.4428	4.99771	0.0556785	1.88648	0.172113	0.00191748	23.3846	Low
Xenopus	XL035	Female	99.69	1.99865	18.8	19.3	20.6	20	0.4428	4.80509	0.0482003	0.895193	0.164884	0.00165397	23.4215	High
Xenopus	XL055	Male	46.835	1.67057	19.5	19.3	20.6	20	0.4428	4.96051	0.105915	1.26773	0.169731	0.00362401	23.3967	High
Xenopus	XL048	Male	43.85	1.64197	18.9	19.4	20.5	20	0.4428	5.30271	0.120928	1.36454	0.18839	0.00429624	23.1524	High
Xenopus	XL054	Female	39.185	1.59312	18.9	19.5	20.8	20	0.4428	9.41862	0.240363	2.37106	0.319705	0.00815887	22.9314	Low
Xenopus	XL046	Female	68.275	1.83426	18.9	19.5	21.1	20	0.4428	8.29666	0.121518	5.26584	0.279568	0.00409474	23.5934	Low
Xenopus	XL049	Male	44.52	1.64856	18.7	19.5	20.8	20	0.4428	9.15586	0.205657	2.41716	0.311089	0.00698763	22.9754	High
Xenopus	XL064	Male	28.22	1.45056	19	6	5.6	5	0.4428	5.13639	0.182012	1.41699	0.17136	0.00607228	8.21973	Low
Xenopus	XL058	Male	23.38	1.36884	19.9	6.3	5.5	5	0.65984	11.0366	0.472054	0.40246	0.308234	0.0131837	7.97552	Low
Xenopus	XL037	Female	117.345	2.06946	18.8	9	6.5	5	0.55132	6.52024	0.0555647	1.79805	0.229126	0.00195258	8.73949	Low
Xenopus	XL060	Female	24.675	1.39226	19.6	7.1	5.7	5	0.55132	6.61915	0.268253	2.20453	0.217994	0.0088346	8.26407	Low
Xenopus	XL033	Female	110.855	2.04476	19	8.6	6.2	5	0.55132	6.92645	0.0624821	0.825164	0.258051	0.00232783	8.42246	Low
Xenopus	XL059	Male	21.115	1.32459	19.3	7.6	6	5	0.55132	7.09946	0.336228	2.58677	0.247367	0.0117152	8.33602	Low
Xenopus	XL045	Female	84.395	1.92632	19.1	8.8	6.3	5	0.55132	6.68564	0.0792184	3.92988	0.220886	0.00261728	8.64063	Low
Xenopus	XL049	Male	44.11	1.64454	20.1	8	5.8	5	0.55132	7.65618	0.17357	0.706965	0.262483	0.00595065	8.14534	Low
Xenopus	XL052	Male	34.59	1.53895	15.9	22.3	25.6	25	0.4428	10.1112	0.292317	1.68959	0.346338	0.0100127	31.056	Low
Xenopus	XL042	Female	89.41	1.95139	17.6	22.5	25.9	25	0.4428	12.3366	0.137978	6.32772	0.430204	0.00481159	31.2161	High
Xenopus	XL039	Female	74.65	1.87303	18.3	25.2	25.1	25	0.4428	13.1328	0.175925	13.5141	0.425851	0.00570464	29.6893	High
Xenopus	XL048	Male	41.605	1.61915	18.3	23.5	25	25	0.4428	12.0409	0.28941	2.23278	0.437934	0.010526	29.4384	High
Xenopus	XL046	Female	66.14	1.82046	18.3	23.3	25.9	25	0.4428	11.9862	0.181224	6.57255	0.438089	0.00662367	31.1758	High
Xenopus	XL056	Male	23.33	1.36791	18.6	22.3	25.5	25	0.4428	8.27009	0.354483	1.73385	0.312809	0.013408	31.0331	High
Xenopus	XL059	Male	20.705	1.31608	17.9	22.2	25.9	25	0.4428	7.96482	0.384681	1.09524	0.286625	0.0138433	31.9492	High
Xenopus	XL037	Female	113.63	2.05549	18.1	24.1	25.8	25	0.4428	9.06713	0.0797952	5.04254	0.309834	0.00272669	31.6336	High
Xenopus	XL058	Male	24.745	1.39349	17.5	30.9	35.7	35	0.4428	8.17444	0.330347	3.18114	0.282931	0.0114339	56.9875	High
Xenopus	XL038	Female	85.56	1.93227	18.7	27.9	35.4	35	0.4428	13.1655	0.153875	7.12038	0.450607	0.00526656	55.1742	High
Xenopus	XL034	Female	90.53	1.95679	18.9	29.8	35.5	35	0.4428	12.2726	0.135563	8.77218	0.433593	0.00478949	55.5786	High
Xenopus	XL035	Female	94.035	1.97329	18.2	29.9	35.4	35	0.4428	13.6148	0.144784	13.4249	0.452166	0.00480849	55.1662	High
Xenopus	XL061	Male	19.62	1.2927	19.6	31.6	35.4	35	0.4428	9.90428	0.504806	3.51615	0.343174	0.017491	55.7229	High
Xenopus	XL050	Female	38.74	1.58816	19.1	30.5	35.3	35	0.4428	9.53711	0.246183	1.93412	0.349624	0.00902489	55.3739	High
Xenopus	XL049	Male	40.81	1.61077	19.3	30.1	35.3	35	0.4428	10.1835	0.249535	2.56524	0.362175	0.00887466	55.3098	High
Xenopus	XL053	Male	35.54	1.55072	19.1	28.7	35.2	35	0.4428	11.3185	0.318472	2.46414	0.422849	0.0118978	54.6855	High
Xenopus	XL060	Female	25.315	1.40338	20	31.7	35.7	35	0.4428	9.61071	0.379645	2.21498	0.331618	0.0130997	56.7389	High
Xenopus	XL054	Female	39.3	1.59439	20.2	14.3	15.4	15	0.4428	12.6498	0.321878	1.27154	0.442379	0.0112565	15.2366	High
Xenopus	XL047	Female	52.655	1.72144	20	15.2	15.4	15	0.4428	7.48474	0.142147	1.2086	0.254922	0.00484137	16.1945	Low
Xenopus	XL055	Male	41.825	1.62144	17.3	15.2	15.6	15	0.4428	6.83143	0.163334	1.84327	0.237722	0.00568374	16.5082	Low
Xenopus	XL045	Female	81.84	1.91297	19	15.8	15.3	15	0.4428	5.91244	0.0722439	2.081	0.209428	0.00255899	16.3149	Low
Xenopus	XL059	Male	19.56	1.29137	19.8	14.8	15.3	15	0.4428	6.41458	0.327944	1.20976	0.225028	0.0115045	16.2352	Low
Xenopus	XL032	Female	117.745	2.07094	19.8	15.5	15.5	15	0.4428	6.91485	0.0587274	3.13093	0.258746	0.00219751	16.2876	Low
Xenopus	XL064	Male	28.045	1.44786	15.8	14	15.2	15	0.4428	6.41006	0.228563	0.888832	0.238119	0.00849061	16.057	Low
Xenopus	XL057	Male	29.75	1.47349	17.7	14.6	15.6	15	0.4428	9.47627	0.31853	0.727963	0.255255	0.00857999	16.4187	Low
Xenopus	XL051	Female	27.675	1.44209	19.7	15.5	15.6	15	0.4428	7.57507	0.273715	1.65809	0.286312	0.0103455	16.2601	Low
Xenopus	XL042	Female	92.55	1.96638	17.3	10.8	10.3	10	0.4428	6.06255	0.0655057	1.58943	0.196584	0.00212408	11.524	Low
Xenopus	XL056	Male	21.43	1.33102	21.8	9.6	9.9	10	0.4428	6.05378	0.282491	0.451757	0.209102	0.00975744	11.1272	Low
Xenopus	XL053	Female	17.405	1.24067	20.5	10	10.4	10	0.4428	6.80858	0.391185	0.22595	0.19166	0.0110118	11.6327	Low
Xenopus	XL047	Female	48.395	1.6848	18.5	10.7	10.4	10	0.4428	6.43477	0.132964	3.08115	0.216103	0.0044654	11.5083	Low
Xenopus	XL052	Male	32.02	1.50542	20.6	10.5	9.9	10	0.4428	6.10798	0.190755	0.299544	0.224849	0.00702214	11.0486	Low
Xenopus	XL034	Female	86.815	1.93859	20.4	10.6	10.1	10	0.4428	6.39093	0.0736155	2.3923	0.224512	0.0025861	11.2149	Low
Xenopus	XL048	Male	39.09	1.59207	20.4	10.6	10.1	10	0.4428	6.43025	0.164499	0.637289	0.228549	0.00584673	11.1943	Low
Xenopus	XL064	Male	25.515	1.4068	20.5	9.7	10.1	10	0.4428	7.38351	0.289379	10.9113	0.237994	0.00932761	11.146	Low

## Sheet: Metadata
Column	Description
Species	Species
ID	Identity of each species using specie code and number to describe the individual (e.g, xl= Xenopus laevis; RT (Racous Toad) = Sclerophrys capensis; RF (River Frog) = Amietia delalandii
Sex	Male or Female
Mass_I	Initial recorded mass before commensing with the respiromentry experimental trial
Mass_F	Mass recorded at the end of the respiromentry experimental trial
Mass	Average mass before and after the experimental trial
Mass_Log	Log (Mass)
Tb_I	Body temeprature recorded before commensing with experimental trial
Tb_F	Body temperature recorded at the end of the experimental trial
Tcham	Ambient temperature in the meatbolic chamber recorded at the end of the experimental trial
Test temp	Ambient temperature at which the trial was conducted at
Fri	Flor rate (l/s)
VO2	Volume of Oxygen used by an individial at rest at a specific test temperature
MVO2	VO2/Mass
VCO2	Volume of carbon dioxide produces by an andividial frog at rest, at a specific test temperature
VH2O	Volume of water vapour produced by an individual frog at rest, at a specific test temperature
MVH2O	(VH2O/Mass)
VPD	Vapour pressure defecit
VPD_C	Vapour pressure defecit categories
